# Supplementary material for: Overexpression of AtPCS1 in tobacco increases arsenic and arsenic plus cadmium accumulation and detoxification
Source: PubMed Central journal article supplement (PMC4757632; doi:10.1007/s00425-015-2428-8), 2015-11-13
Supplement: 425_2015_2428_MOESM3_ESM.pdf [file 425_2015_2428_MOESM3_ESM.pdf]

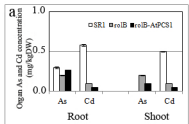

Article title: Overexpression of *AtPCS1* in tobacco increases Arsenic and Arsenic plus cadmium accumulation and detoxification

Journal name: *Planta*

Author names: Zanella L, Fattorini L., Brunetti P, Roccotiello E, Cornara L, D'Angeli S, Della Rovere F, Cardarelli M, Barbieri M, Sanità di Toppi L, Degola F, Lindberg S, Altamura MM, Falasca G.

Corresponding Author: Department of Environmental Biology, Sapienza University of Rome -Italy e-mail: giuseppina.falasca@uniroma1.it

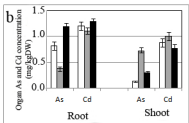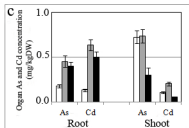

Supplementary Fig S3
